# Supplementary material
Source: PubMed Central journal article supplement (PMC10070142)
Supplement: mmc1.pdf [file mmc1.pdf]

# **Efficacy and safety of frontline systemic therapy for advanced HCC: a network meta-analysis of landmark phase III trials**

Claudia Angela Maria Fulgenzi, Bernhard Scheiner, James Korolewicz, Charalampos-Vlasios Stikas, Alessandra Gennari, Bruno Vincenzi, Mark R. Openshaw, Marianna Silletta, Matthias Pinter, Alessio Cortellini, Lorenza Scotti, Antonio D'Alessio, David J. Pinato

## Table of contents

|                              |    |
|------------------------------|----|
| Supplementary Methods 1..... | 2  |
| Supplementary Methods 2..... | 3  |
| Fig. S1.....                 | 4  |
| Fig. S2.....                 | 4  |
| Fig. S3.....                 | 5  |
| Fig. S4.....                 | 5  |
| Fig. S5.....                 | 6  |
| Fig. S6.....                 | 6  |
| Table S1.....                | 7  |
| Table S2.....                | 10 |
| Table S3.....                | 11 |
| Table S4.....                | 11 |

## Supplementary Methods 1.

Search terms applied to publication databases and secondary sources.

1. exp Carcinoma, Hepatocellular/ or exp Liver Neoplasms/
2. HCC
3. (hepat\* or liver) adj3 (neoplasm\* or cancer\* or tumo?r\* or malignan\* or carcinoma\*)
4. 1 or 2 or 3
5. exp Sorafenib/
6. (sorafenib or nexavar\*)
7. Exp Atezolizumab/
8. (atezolizumab or tecentriq\* or mpdl 3280\* or mpdl3280\* or rg 7446 or rg7446)
9. exp Nivolumab/
10. (nivolumab or opdivo\* or bms-936558 or mdx-1106 or ono-4538 or bms936558 or 'mdx1106' or 'ono4538')
11. exp Bevacizumab/
12. (bevacizumab or avastin\*)
13. (lenvatinib or lenvima\* or kispplx\* or 'e 7080' or 'e7080')
14. exp Durvalumab/
15. (durvalumab or imfinzi\* or medi4736 or medi-4736)
16. exp Tremelimumab/
17. (tremelimumab or cp-675206\*)
18. exp Sintilimab/
19. (sintilimab or tyvyt\* or ibi308\*)
20. exp IBI305/
21. exp Donafenib/
22. (donafenib or cm 4307 or donafenib tosilate or donafenib tosylate or zeprosen\* or zeprosyn\*)
23. exp Pembrolizumab/
24. pembrolizumab
25. exp Tislelizumab/
26. (tislelizumab or BGB-A317)
27. exp Camrelizumab/
28. (camrelizumab or AiRuiKa)
29. exp Rivoceranib/
30. (rivoceranib or apatinib)
31. exp Sunitinib/
32. (sunitinib or Sutent or SU11248)
33. exp Brivanib/
34. (Brivanib or Brivanib alaninate or BMS582664)
35. exp Linifanib/
36. (linifanib or ABT869)
37. 5 or 6 or 7 or 8 or 9 or 10 or 11 or 12 or 13 or 14 or 15 or 16 or 17 or 18 or 19 or 20 or 21 or 22 or 23 or 24 or 25 or 26 or 27 or 28 or 29 or 30 or 31 or 32 or 33 or 34 or 35 or 36
38. randomized controlled trial.pt.
39. controlled clinical trial.pt.
40. randomi#ed.ab.
41. placebo.ab.
42. randomly.ab.
43. clinical trials as topic.sh.
44. trial.ti.
45. 38 or 39 or 40 or 41 or 42 or 43 or 44
46. 4 and 37 and 45

## **Supplementary Methods 2.**

Searches examined in hand search.

1. Scientific conference presentations (2007–2022):

- European Society for Medical Oncology
- American Society of Clinical Oncology (including the Gastrointestinal Cancers Symposium)
- European Association for the Study of the Liver
- American Association for the Study of Liver Diseases

## **Supplementary Methods 3.**

Data collection strategy and data analysis.

The following data were considered: study name and/or lead author name, publication year, characteristics of experimental and control arms, age of participants at study enrolment, proportion of subjects: i) living in western regions, ii) with microvascular invasion (MVI), iii) with extra-hepatic spread (EHS), iv) with viral aetiology, v) with Child Pugh A liver class vi) with ECOG status equal to 0 and vii) HCC staging according to BCLC system. Data on best overall radiologic response to treatment and overall response rates (ORR) were collected in parallel. Moreover, the number and percentage of subjects who experienced AEs of any grade or AEs of grade 3 or higher was retrieved for each treatment arm. In our comparative analysis of safety outcomes, we intended to account for adverse events potentially related to the underlying liver disease and underlying progressive malignancy, which contributes to influence prognosis and quality of life in HCC patients. We therefore considered AEs of all type rather than focusing only on treatment-related AEs. Lastly, we collected hazard ratios (HRs) and corresponding 95% confidence intervals (95%CI) for the association between treatments and OS and PFS.

A frequentist network meta-analysis using (i) sorafenib and (ii) atezolizumab plus bevacizumab as the comparator was performed to compare (a) the efficacy (OS, PFS, ORR and DCR) as well as (b) the safety (all grade AE, and grade  $\geq 3$  AEs) of different treatment options. Data on ORR, DCR and AEs extracted from the studies were considered to calculate odds ratios (ORs) and relative risks (RRs) as well as corresponding 95% confidence intervals (CIs) for the association between treatment regimens and radiological response or the occurrence of AEs, respectively. Fixed effect multivariable meta-regression models were performed to estimate the indirect hazard HRs, ORs or RRs and respective 95% CIs. Two analyses were performed to evaluate efficacy: the first compared the efficacy of sorafenib with all other treatment options as sorafenib was the gold-standard comparator for most of the included trials; the second analysis evaluated the efficacy of atezolizumab plus bevacizumab, the current standard of care, against all other treatment options. For safety, the incidence of AEs (all grade AE, and grade  $\geq 3$  AEs) was compared to sorafenib. Forest plots were generated to graphically demonstrate the comparisons of interest ranking treatments according to their HRs. P-scores for efficacy (OS and PFS) were reported. P-scores are a measure reflecting the extent of certainty that a treatment is better than another one, averaged over all competing therapies.

**Fig. S1.** Forest plot, HR and corresponding confidence intervals for the association between atezolizumab plus bevacizumab and mortality considering each other treatment as reference.

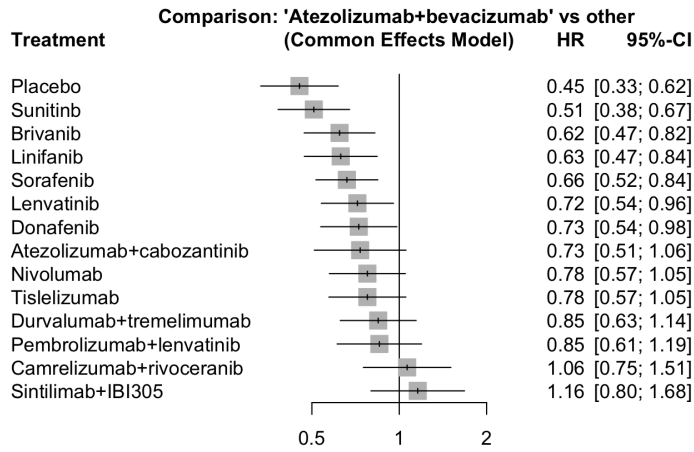

**Fig. S2.** Forest plot, HR and corresponding confidence intervals for the association between atezolizumab plus bevacizumab and progression considering each other treatment as reference.

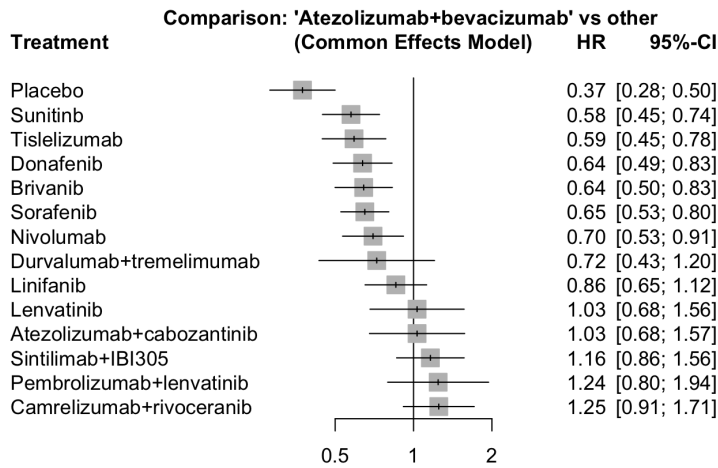

**Fig. S3.** Forest plot, HR and corresponding confidence intervals for the association between Sorafenib and mortality considering Sorafenib as reference in HBV patients.

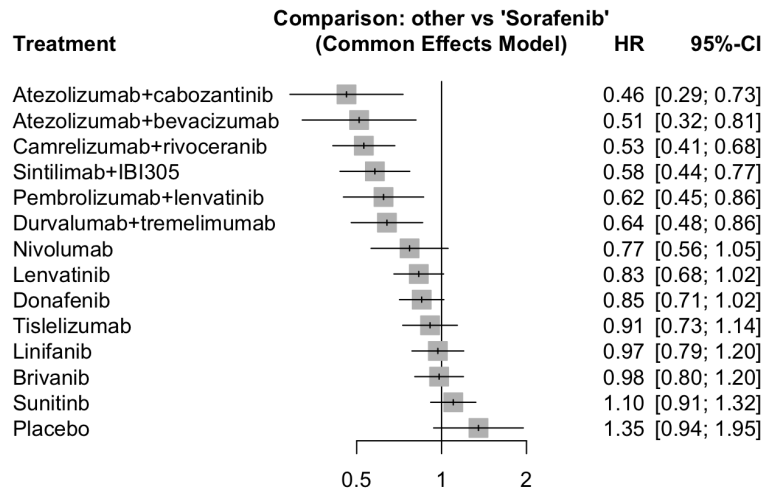

**Fig. S4.** Forest plot, HR and corresponding confidence intervals for the association between Sorafenib and mortality considering Sorafenib as reference in HCV patients.

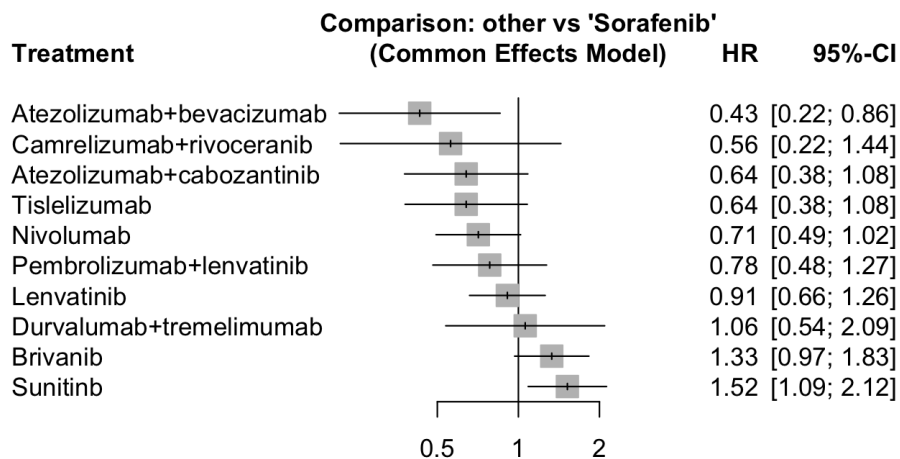

**Fig. S5.** Forest plot, HR and corresponding confidence intervals for the association between Sorafenib and mortality considering Sorafenib as reference in non-viral patients.

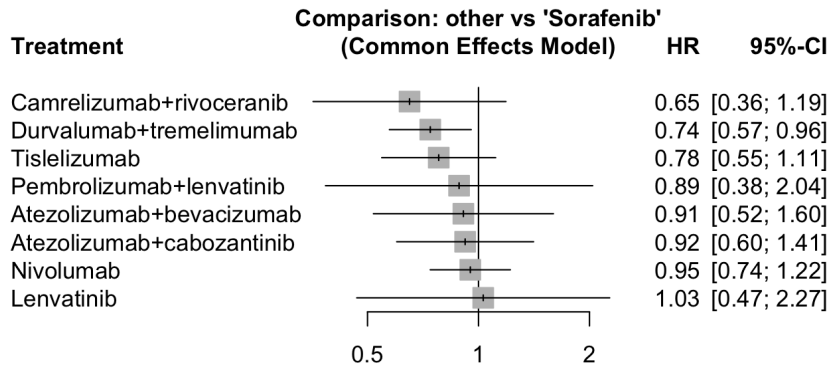

**Fig. S6.** Forest plot, HR and corresponding confidence intervals for the association between Sorafenib and mortality considering Sorafenib as reference in patients with EHS and/or MVI

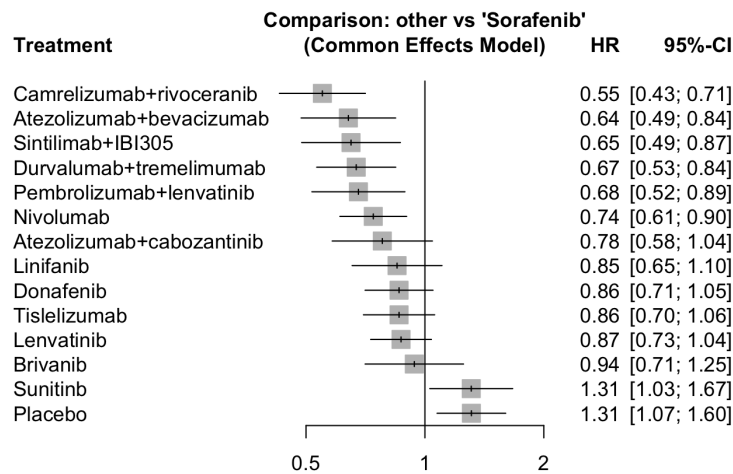

\*For Sunitinib, the HR was available only for patients with macro-vascular invasion

**Table S1.**

Description of the trials included in the analysis.

| Name                    | Inclusion Criteria                                                                                                                                                                       | Experimental arm                               | Control arm | Primary Endpoint (s)                      | Secondary Endpoint (s)                                                    | Sample size                         |
|-------------------------|------------------------------------------------------------------------------------------------------------------------------------------------------------------------------------------|------------------------------------------------|-------------|-------------------------------------------|---------------------------------------------------------------------------|-------------------------------------|
| Johnson P. et al., 2013 | Advanced HCC, first-line, Child A, ECOG PS 0 or 1, , w/out MVI at vp4<br><br><b>Stratifications:</b><br>-ECOG PS 0 or 1<br>-EHS +/- MVI<br>-Region                                       | Brivanib                                       | Sorafenib   | OS (non-inferiority)                      | TTP; ORR; DCR; safety                                                     | 577 (Bri), 578 (Sor) [ITT]          |
| Cheng A. et al., 2013   | Advanced or metastatic HCC, Child A, ECOG PS 0-1<br><br><b>Stratifications:</b><br>-Region<br>-Prior TACE<br>-MVI, EHS                                                                   | Sunitinib                                      | Sorafenib   | OS                                        | PFS; TTP, safety                                                          | 530 (Sun), 544 (Sor)                |
| Cainap C. et al., 2015  | Advanced HCC, first-line, Child A, ECOG 0 or 1<br><br><b>Stratifications:</b><br>-Region (Outside Asia, Japan and rest of Asia)<br>-ECOG PS 0 or 1<br>-MVI, EHS<br>-HBV (yes or no)      | Linifanib                                      | Sorafenib   | OS (both superiority and non-inferiority) | TTP; ORR                                                                  | 514 (Lin), 521 (Sor) [ITT]          |
| REFLECT                 | Advanced HCC, first line, Child A, ECOG 0-1, w/out MVI at vp4 or bile duct invasion<br><br><b>Stratification:</b><br>-MVI and EHS or both<br>-Region<br>-ECOG<br>-Body weight (<60/>60). | Lenvatinib                                     | Sorafenib   | OS (Non-inferiority)                      | -PFS (superiority)<br><br>-ORR (per RECIST and mRECIST by central review) | 478 (lenvatinib)<br>476 (sorafenib) |
| IMbrave150              | Advanced HCC, first line, Child A, ECOG 0-1, treated varices<br><br><b>Stratification:</b><br>-MVI and EHS<br>-Region<br>-Afp<br>-ECOG                                                   | Atezolizumab +Bevacizumab                      | Sorafenib   | OS and PFS (coprimary)                    | -ORR (per RECIST and mRECIST by central review)<br><br>-DOR<br><br>-QoL   | 336 (A+B)<br>165 (Sor)              |
| COSMIC-312              | Advanced HCC, first line, Child A, ECOG 0-1<br><br><b>Stratification:</b>                                                                                                                | Atezolizumab +Cabozantinib<br><br>Cabozantinib | Sorafenib   | PFS per RECIST version 1.1 by BIRC        | - PFS per RECIST version 1.1 by BIRC for single-agent                     | 370 (A+C)<br>185 (sorafenib)        |

|                   |                                                                                                                                                                                                                                        |                                               |           |                                                      |                                                                                                                                                                         |                                                   |
|-------------------|----------------------------------------------------------------------------------------------------------------------------------------------------------------------------------------------------------------------------------------|-----------------------------------------------|-----------|------------------------------------------------------|-------------------------------------------------------------------------------------------------------------------------------------------------------------------------|---------------------------------------------------|
|                   | -Region<br>-MVI and EHS<br>-Etiology (HBV-HCV-<br>other)                                                                                                                                                                               |                                               |           | and OS<br>(coprimary)<br><br>for a+c vs<br>sorafenib | cabozantinib<br>versus sorafenib.                                                                                                                                       | 185<br>(cabozantinib)                             |
| HIMALAYA          | Advanced HCC, first line,<br>Child A, ECOG 0-1, w/out<br>MVI at vp4<br><br><b>Stratification:</b><br>-MVI<br>-Etiology (HBV-HCV-<br>other)<br>-ECOG PS                                                                                 | Durvalumab<br>+tremelimumab<br><br>Durvalumab | Sorafenib | OS of D+T<br>versus<br>sorafenib                     | -OS for<br>durvalumab<br>versus sorafenib<br>(Non inferiority),<br>-ORR for D+T and<br>D alone<br><br>-PFS<br>-DOR<br>-DCR<br><br>Per RECIST,<br>investigator<br>review | 1324 (total)<br>393 (D+T),<br>389 (D), 389<br>(S) |
| Check-Mate<br>459 | Advanced HCC, first line,<br>Child A, ECOG 0-1<br><b>Stratification:</b><br>-MVI or extrahepatic<br>metastasis<br>-baseline $\alpha$ -fetoprotein<br>level (<400 ng/mL vs<br>$\geq$ 400 ng/mL)<br>-ECOG performance<br>status (0 vs 1) | Nivolumab                                     | Sorafenib | OS                                                   | -PFS<br>-ORR<br>-per RECIST by<br>central review)                                                                                                                       | 317 (nivo)<br>372<br>(sorafenib)                  |
| SHARP             | Advanced HCC, first line,<br>Child A, ECOG 0-1-2<br><br><b>Stratification:</b><br>-Region<br>-MVI or EHS(yes or no)<br>-ECOG (0 vs 1-2)                                                                                                | Sorafenib                                     | Placebo   | OS and<br>time to<br>symptomatic<br>progression      | -time to<br>radiological<br>progression<br>-DCR<br>-Safety                                                                                                              | 299<br>(sorafenib)<br>300 (placebo)               |
| ASIA-PACIFIC      | Advanced HCC, first line,<br>Child A, ECOG 0-1-2, in<br>Asia<br><br><b>Stratification:</b><br>-Region<br>-MVI or EHS(yes or no)<br>-ECOG (0 vs 1-2)                                                                                    | Sorafenib                                     | Placebo   | OS                                                   | -time to to<br>progression<br>-time to<br>symptomatic<br>progression                                                                                                    | 150<br>(sorafenib)<br>76 (placebo)                |
| ORIENT-32         | Advanced HCC, first line,<br>Child A, ECOG 0-1, w/out<br>MVI at vp4<br><br><b>Stratification:</b><br>-MVI or extrahepatic<br>metastasis<br>-baseline $\alpha$ -fetoprotein<br>level (<400 ng/mL vs<br>$\geq$ 400 ng/mL)                | Sintilimab +<br>IBI305                        | Sorafenib | OS and PFS<br>(coprimary)                            |                                                                                                                                                                         | 380<br>(sintilimab)<br>191<br>(sorafenib)         |



|                     |                                                                                                                                                                                                                                                                                      |                            |                      |                        |                                                                     |                                       |
|---------------------|--------------------------------------------------------------------------------------------------------------------------------------------------------------------------------------------------------------------------------------------------------------------------------------|----------------------------|----------------------|------------------------|---------------------------------------------------------------------|---------------------------------------|
|                     | -ECOG performance status (0 vs 1)                                                                                                                                                                                                                                                    |                            |                      |                        |                                                                     |                                       |
| Qin S. et al., 2021 | Advanced HCC, first line, Child A-B (7), ECOG 0-1-2, in Asia<br><br><b>Stratification:</b><br>-Baseline $\alpha$ -fetoprotein level (<400 ng/mL vs $\geq$ 400 ng/mL)<br><br>-MVI or extrahepatic metastasis (yes vs no)<br><br>-BCLC stage (B vs C)<br><br>-Previous LRT (yes vs no) | Donafenib                  | Sorafenib            | OS                     | PFS; TTP; ORR; TTF                                                  | 334 (don)<br>334 (sor)                |
| LEAP-002            | Advanced HCC, first-line, Child A, ECOG 0-1, w/out MVI at vp4 or bile duct invasion<br><br><b>Stratification:</b><br>-Baseline $\alpha$ -fetoprotein level (<400 ng/mL vs $\geq$ 400 ng/mL)<br><br>-MVI or extrahepatic metastasis (yes vs no)<br>-ECOG PS (0 vs 1)<br>-Region       | Lenvatinib + Pembrolizumab | Lenvatinib + placebo | OS and PFS (coprimary) | ORR and DOR per RECIST v1.1 and mRECIST by BICR Safety/tolerability | 395 (Len/Pembro)<br>399 (Len/placebo) |
| Qin S. et al., 2022 | Advanced HCC, first-line, Child A, ECOG 0 or 1<br><br><b>Stratifications:</b><br>-MVI and/or EHS (yes or no)<br>-Region<br>- Baseline $\alpha$ -fetoprotein level (<400 ng/mL vs $\geq$ 400 ng/mL)                                                                                   | Camrelizumab + rivoceranib | Sorafenib            | OS and PFS (coprimary) | ORR by RECIST 1.1                                                   | 272 (Cam/Rivo)<br>271 (Sorafenib)     |
| RATIONALE 301       | Advanced HCC, first-line, Child A, ECOG 0 or 1, w/out thrombus MVI at Vp4 or IVC<br><br><b>Stratifications:</b><br>-MVI, EHS<br>-ECOG PS<br>-Aetiology (HCV vs other (inc HBV)<br>-Region (Asia vs Japan + Rest of the world)                                                        | Tislelizumab               | Sorafenib            | OS (non-inferiority)   | ORR; PFS; DOR, safety                                               | 342 (Tis), 332 (Sor)                  |

**Table S2.** Risk of bias assessment according to the Cochrane risk of bias assessment tool

|                                | <b>Random sequence generation</b> | <b>Allocation concealment</b> | <b>Blinding of participants and personnel</b> | <b>Blinding of outcome assessment</b> | <b>Incomplete outcome data</b> | <b>Selective reporting</b> | <b>Other bias</b> |
|--------------------------------|-----------------------------------|-------------------------------|-----------------------------------------------|---------------------------------------|--------------------------------|----------------------------|-------------------|
| <b>Cheng A. et al., 2013</b>   | Low risk                          | Low risk                      | High risk                                     | High risk                             | Low risk                       | Low risk                   | Low risk          |
| <b>Johnson P. et al., 2013</b> | Low risk                          | Low risk                      | Low risk                                      | Low risk                              | Low risk                       | Low risk                   | Low risk          |
| <b>Cainap C. et al., 2015</b>  | Low risk                          | Low risk                      | High risk                                     | High risk                             | Low risk                       | Low risk                   | Low risk          |
| <b>REFLECT</b>                 | Low risk                          | Low risk                      | High risk                                     | Low risk                              | Low risk                       | Low risk                   | Low risk          |
| <b>IMbrave150</b>              | Low risk                          | Low risk                      | High risk                                     | Low risk                              | Low risk                       | Low risk                   | Low risk          |
| <b>COSMIC-312</b>              | Low risk                          | Low risk                      | High risk                                     | Low risk                              | Low risk                       | Low risk                   | Low risk          |
| <b>HIMALAYA</b>                | Low risk                          | Low risk                      | High risk                                     | High risk                             | Low risk                       | Low risk                   | Low risk          |
| <b>CheckMate-459</b>           | Low risk                          | Low risk                      | High risk                                     | Low risk                              | Low risk                       | Low risk                   | Low risk          |
| <b>SHARP</b>                   | Low risk                          | Low risk                      | Low risk                                      | Low risk                              | Low risk                       | Low risk                   | Low risk          |
| <b>Asia PACIFIC</b>            | Low risk                          | Low risk                      | Low risk                                      | Low risk                              | Low risk                       | Low risk                   | Low risk          |
| <b>ORIENT-32</b>               | Low risk                          | Low risk                      | High risk                                     | Low risk                              | Low risk                       | Low risk                   | Low risk          |
| <b>Qin et al. 2021</b>         | Low risk                          | Low risk                      | High risk                                     | Low risk                              | Low risk                       | Low risk                   | Low risk          |
| <b>LEAP-002</b>                | Low risk                          | Low risk                      | Low risk                                      | Low risk                              | Low risk                       | Low risk                   | Low risk          |
| <b>Qin S. et al., 2022</b>     | Low risk                          | Low risk                      | Low risk                                      | Low risk                              | Low risk                       | Low risk                   | Low risk          |
| <b>RATIONALE 301</b>           | Low risk                          | Low risk                      | Low risk                                      | Low risk                              | Low risk                       | Low risk                   | Low risk          |

**Table S3.** P-scores reporting the probability for each treatment of being the best in reducing the risk of death.

| <b>Treatment</b>          | <b>p-score</b> |
|---------------------------|----------------|
| Sintilimab+IBI305         | 0.9530         |
| Camrelizumab+rivoceranib  | 0.9091         |
| Atezolizumab+bevacizumab  | 0.8632         |
| Pembrolizumab+lenvatinib  | 0.7100         |
| Durvalumab+tremelimumab   | 0.7016         |
| Nivolumab                 | 0.5772         |
| Tislelizumab              | 0.5765         |
| Atezolizumab+cabozantinib | 0.4815         |
| Donafenib                 | 0.4660         |
| Lenvatinib                | 0.4428         |
| Sorafenib                 | 0.2946         |
| Linifanib                 | 0.2329         |
| Brivanib                  | 0.2158         |
| Sunitinb                  | 0.0632         |
| Placebo                   | 0.0127         |

**Table S4.** P-scores reporting the probability for each treatment of being the best in reducing the risk of PFS events.

| <b>Treatment</b>          | <b>p-score</b> |
|---------------------------|----------------|
| Camrelizumab+rivoceranib  | 0.9075         |
| Pembrolizumab+lenvatinib  | 0.8993         |
| Sintilimab+IBI305         | 0.8508         |
| Atezolizumab+cabozantinib | 0.7452         |
| Lenvatinib                | 0.7287         |
| Atezolizumab+bevacizumab  | 0.7184         |
| Linifanib                 | 0.5882         |
| Durvalumab+tremelimumab   | 0.4201         |
| Nivolumab                 | 0.4142         |
| Sorafenib                 | 0.3214         |
| Brivanib                  | 0.2993         |
| Donafenib                 | 0.2837         |
| Tislelizumab              | 0.1831         |
| Sunitinb                  | 0.1398         |
| Placebo                   | 0.0004         |
